# Supplementary material for: New dinuclear palladium(ii) complexes with formamidine and bridged pyrophosphate ligands
Source: Royal Society of Chemistry journal article supplement (doi:10.1039/c6nj01262k), 2016-01-01
Supplement: c6nj01262k1.pdf [file c6nj01262k1.pdf]

## New dinuclear palladium(II) complexes with formamidine and bridged pyrophosphate ligands

Ahmed A. Soliman<sup>1,2\*</sup>, Othman I. Alajrawy<sup>1,3</sup>, Fawzy A. Attabi<sup>1</sup> and Wolfgang Linert<sup>2</sup>

New Journal of Chemistry - ID NJ-ART-04-2016-001262

### Supplementary Data

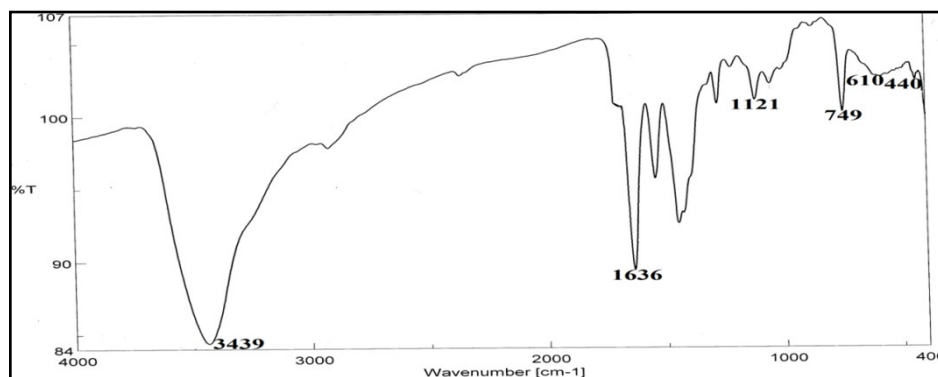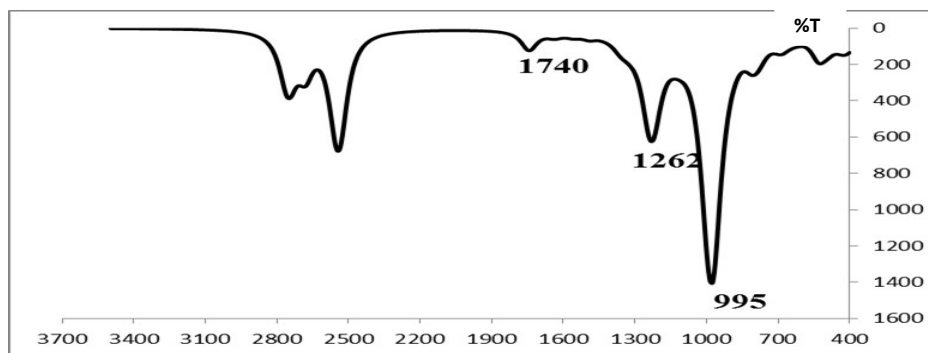

Wave number ( cm<sup>-1</sup>)

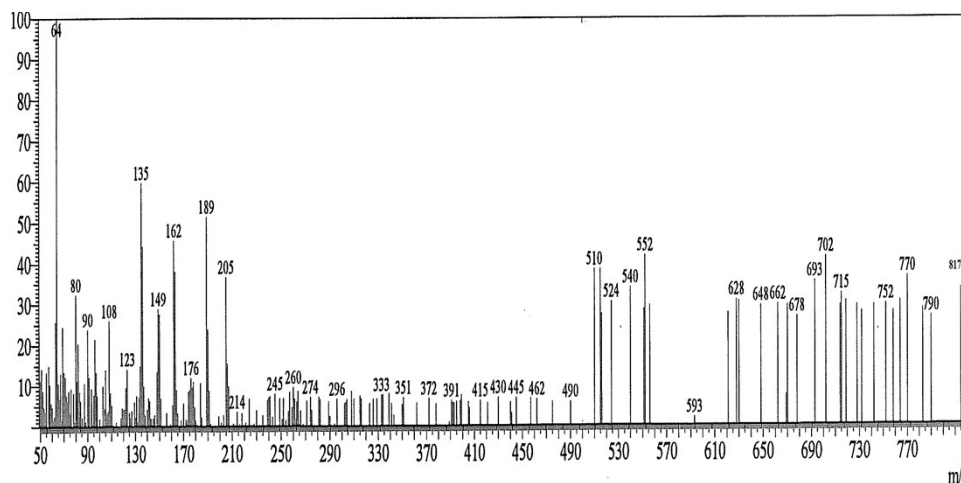

S1: The experimental, calculated IR spectrum and Mass spectrum of [(PdL<sub>1</sub>)<sub>2</sub>μPPI].H<sub>2</sub>O complex (1).

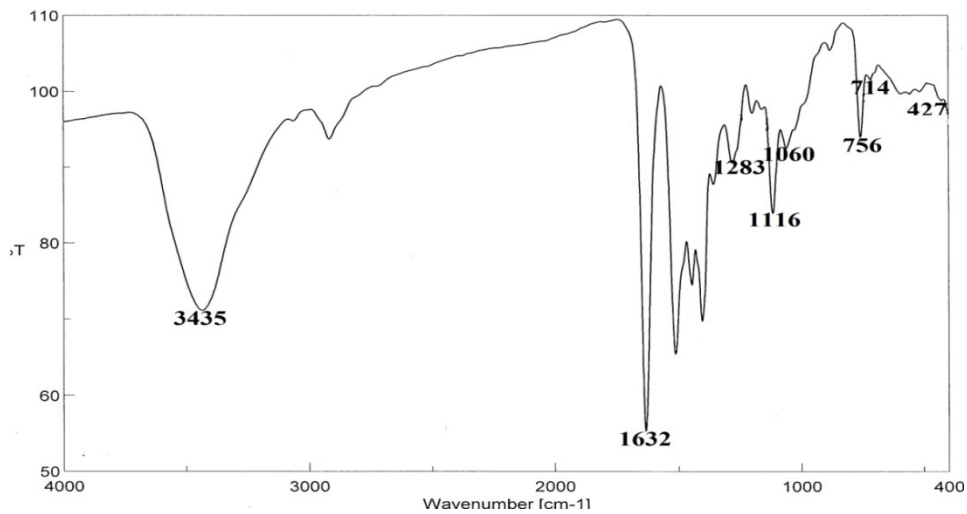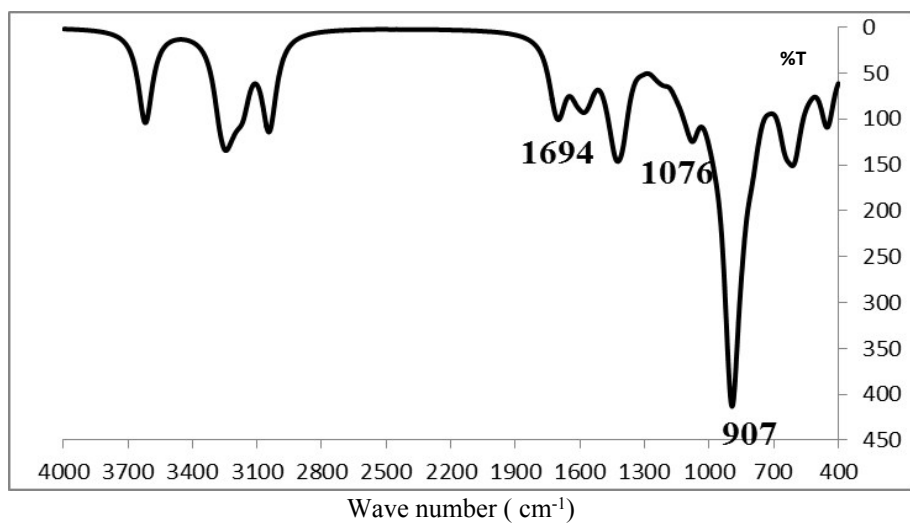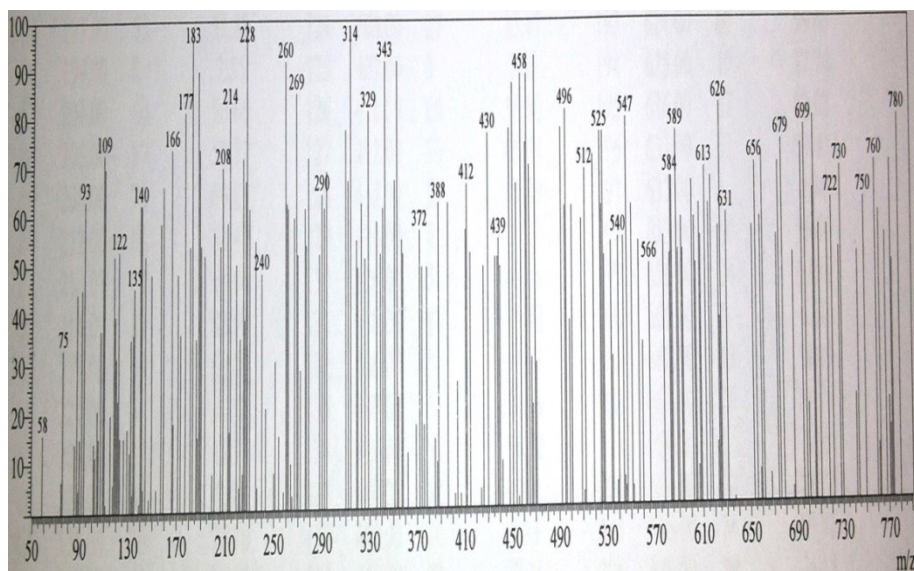

S2: The experimental, calculated IR spectrum and Mass spectrum of  $[(\text{PdL}_2)_2\mu\text{PPi}]\cdot\text{H}_2\text{O}$  complex (2).

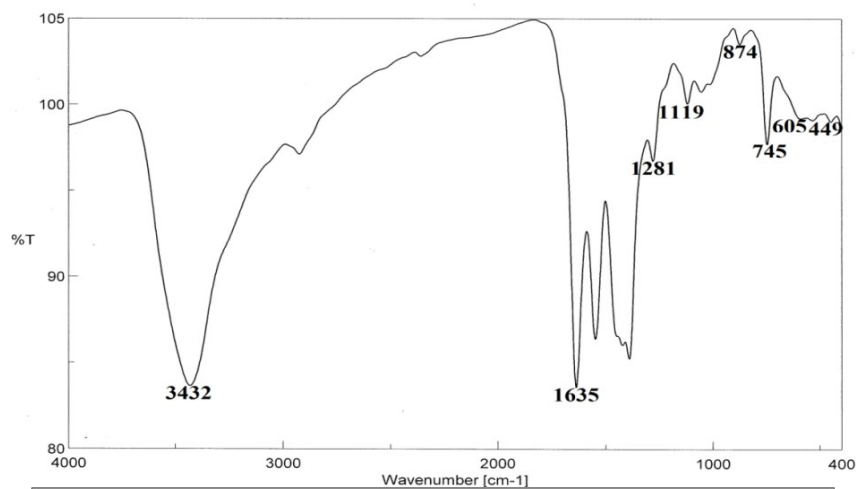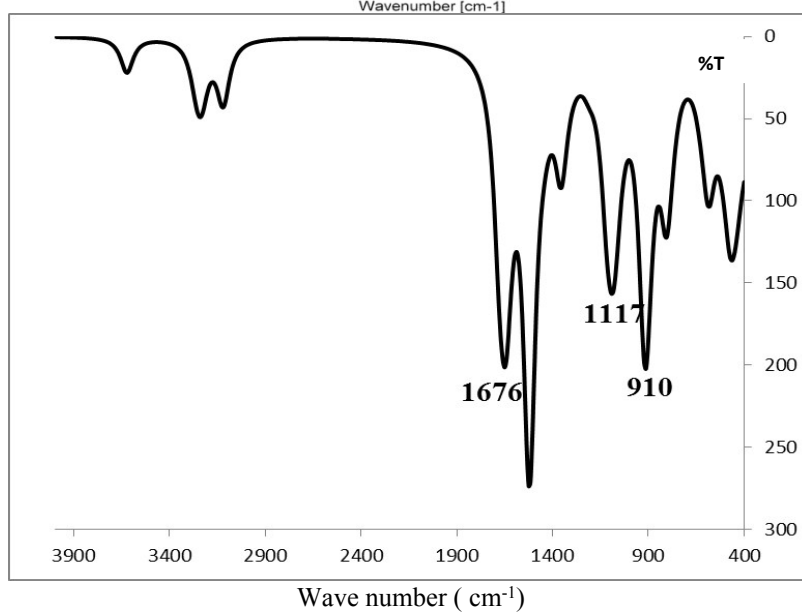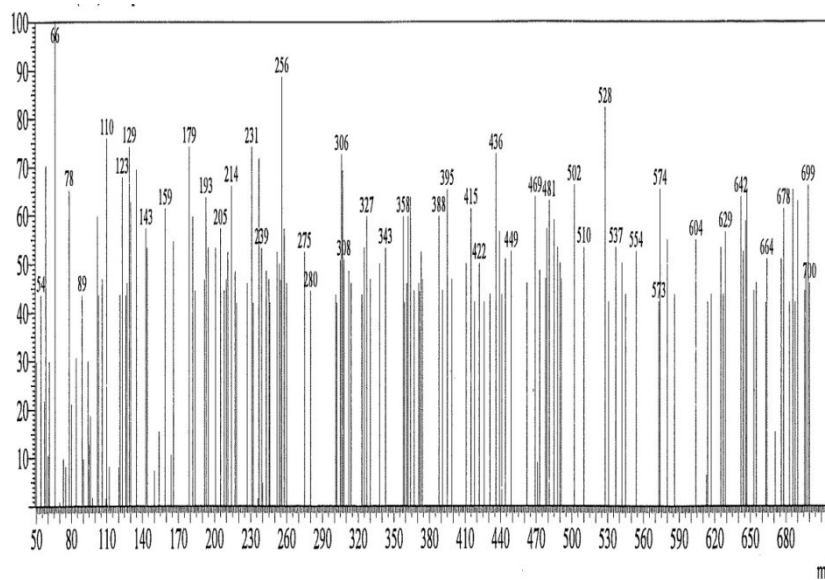

S3: The experimental, calculated IR spectrum and Mass spectrum of [(PdL<sub>3</sub>)<sub>2</sub>μPPi].4H<sub>2</sub>O complex (3).
